# Supplementary material for: Marine Plastic Pollution in Waters around Australia: Characteristics, Concentrations, and Pathways
Source: PubMed Central journal article supplement (PMC3842337; doi:10.1371/journal.pone.0080466), 2013-11-27
Supplement: pone.0080466.s001.pdf [file pone.0080466.s001.pdf]

Table S1

| Net Station | Date (UTC) | Latitude (S) | Longitude (E) | Sea Surface Concentration (Cs) |
|-------------|------------|--------------|---------------|--------------------------------|
| 1           | 10.06.11   | 39 18.663    | 163 35.799    | 653.51                         |
| 1           | 10.06.11   | 39 18.663    | 163 35.799    | 691.96                         |
| 1           | 10.06.11   | 39 18.663    | 163 35.799    | 566.79                         |
| 2           | 11.06.11   | 39 57.089    | 160 25.080    | 950.45                         |
| 2           | 11.06.11   | 39 57.089    | 160 25.080    | 2198.90                        |
| 2           | 11.06.11   | 39 57.089    | 160 25.080    | 1217.12                        |
| 3           | 12.06.11   | 40 38.087    | 155 53.425    | 1424.92                        |
| 3           | 12.06.11   | 40 38.087    | 155 53.425    | 3254.64                        |
| 3           | 12.06.11   | 40 38.087    | 155 53.425    | 0.00                           |
| 4           | 13.06.11   | 41 08.068    | 152 17.007    | 785.90                         |
| 4           | 13.06.11   | 41 08.068    | 152 17.007    | 0.00                           |
| 4           | 13.06.11   | 41 08.068    | 152 17.007    | 1810.17                        |
| 5           | 12.08.11   | 43 34.637    | 145 47.977    | 32167.51                       |
| 5           | 12.08.11   | 43 34.637    | 145 47.977    | 29582.80                       |
| 5           | 12.08.11   | 43 34.637    | 145 47.977    | 9081.73                        |
| 6           | 13.08.11   | 41 55.318    | 144 32.515    | 24299.60                       |
| 6           | 13.08.11   | 41 55.318    | 144 32.515    | 6077.41                        |
| 6           | 13.08.11   | 41 55.318    | 144 32.515    | 0.00                           |
| 7           | 14.08.11   | 39 02.484    | 142 25.125    | 3554.15                        |
| 7           | 14.08.11   | 39 02.484    | 142 25.125    | 3211.54                        |
| 7           | 14.08.11   | 39 02.484    | 142 25.125    | 2477.57                        |
| 8           | 15.08.11   | 37 53.346    | 139 49.553    | 931.74                         |
| 8           | 15.08.11   | 37 53.346    | 139 49.553    | 2513.76                        |
| 8           | 15.08.11   | 37 53.346    | 139 49.553    | 13625.39                       |
| 9           | 16.08.11   | 36 03.358    | 135 41.202    | 4177.68                        |
| 9           | 16.08.11   | 36 03.358    | 135 41.202    | 2015.15                        |
| 9           | 16.08.11   | 36 03.358    | 135 41.202    | 0.00                           |
| 10          | 17.08.11   | 35 28.841    | 132 10.928    | 2332.49                        |
| 10          | 17.08.11   | 35 28.841    | 132 10.928    | 0.00                           |
| 10          | 17.08.11   | 35 28.841    | 132 10.928    | 1381.05                        |
| 11          | 18.08.11   | 35 04.329    | 127 15.958    | 0.00                           |
| 11          | 18.08.11   | 35 04.329    | 127 15.958    | 0.00                           |
| 11          | 18.08.11   | 35 04.329    | 127 15.958    | 0.00                           |
| 12          | 19.08.11   | 34 36.224    | 121 49.046    | 0.00                           |
| 12          | 19.08.11   | 34 36.224    | 121 49.046    | 1603.96                        |
| 12          | 19.08.11   | 34 36.224    | 121 49.046    | 1099.32                        |
| 13          | 20.08.11   | 35 18.893    | 118 37.370    | 1540.86                        |
| 13          | 20.08.11   | 35 18.893    | 118 37.370    | 0.00                           |
| 13          | 20.08.11   | 35 18.893    | 118 37.370    | 2852.58                        |
| 14          | 22.08.11   | 33 06.825    | 114 29.446    | 889.63                         |
| 14          | 22.08.11   | 33 06.825    | 114 29.446    | 0.00                           |
| 14          | 22.08.11   | 33 06.825    | 114 29.446    | 458.30                         |
| 15          | 11.04.12   | 41 53.867    | 148 26.891    | 708.09                         |
| 15          | 11.04.12   | 41 53.867    | 148 26.891    | 2732.41                        |
| 15          | 11.04.12   | 41 53.867    | 148 26.891    | 2355.35                        |
| 16          | 12.04.12   | 39 39.389    | 148 53.558    | 0.00                           |
| 16          | 12.04.12   | 39 39.389    | 148 53.558    | 0.00                           |
| 16          | 12.04.12   | 39 39.389    | 148 53.558    | 0.00                           |
| 17          | 13.04.12   | 37 38.671    | 150 23.827    | 3823.59                        |
| 17          | 13.04.12   | 37 38.671    | 150 23.827    | 3313.01                        |
| 17          | 13.04.12   | 37 38.671    | 150 23.827    | 2840.54                        |
| 18          | 13.04.12   | 35 24.230    | 150 50.390    | 8361.99                        |
| 18          | 13.04.12   | 35 24.230    | 150 50.390    | 18324.00                       |
| 18          | 13.04.12   | 35 24.230    | 150 50.390    | 6313.02                        |
| 19          | 14.04.12   | 33 52.897    | 152 0.189     | 2903.60                        |
| 19          | 14.04.12   | 33 52.897    | 152 0.189     | 7374.21                        |
| 19          | 14.04.12   | 33 52.897    | 152 0.189     | 3858.96                        |
| 20          | 15.04.12   | 33 10.310    | 152 41.536    | 5966.14                        |
| 20          | 15.04.12   | 33 10.310    | 152 41.536    | 19119.87                       |
| 20          | 15.04.12   | 33 10.310    | 152 41.536    | 33412.23                       |
| 21          | 15.04.12   | 31 01.893    | 153 22.585    | 1954.41                        |
| 21          | 15.04.12   | 31 01.893    | 153 22.585    | 3818.55                        |

|    |          |           |            |          |
|----|----------|-----------|------------|----------|
| 21 | 15.04.12 | 31 01.893 | 153 22.585 | 4404.43  |
| 22 | 16.04.12 | 28 20.522 | 153 55.265 | 9943.10  |
| 22 | 16.04.12 | 28 20.522 | 153 55.265 | 21021.85 |
| 22 | 16.04.12 | 28 20.522 | 153 55.265 | 32595.07 |
| 23 | 17.04.12 | 26 43.789 | 153 22.675 | 7064.40  |
| 23 | 17.04.12 | 26 43.789 | 153 22.675 | 4327.06  |
| 23 | 17.04.12 | 26 43.789 | 153 22.675 | 6168.01  |
| 24 | 04.05.12 | 24 55.084 | 155 12.525 | 743.14   |
| 24 | 04.05.12 | 24 55.084 | 155 12.525 | 0.00     |
| 24 | 04.05.12 | 24 55.084 | 155 12.525 | 0.00     |
| 25 | 06.05.12 | 23 52.232 | 162 20.311 | 5835.56  |
| 25 | 06.05.12 | 23 52.232 | 162 20.311 | 7695.14  |
| 25 | 06.05.12 | 23 52.232 | 162 20.311 | 10077.88 |
| 26 | 07.05.12 | 23 12.812 | 166 37.146 | 616.07   |
| 26 | 07.05.12 | 23 12.812 | 166 37.146 | 0.00     |
| 26 | 07.05.12 | 23 12.812 | 166 37.146 | 0.00     |
| 27 | 08.05.12 | 21 46.153 | 170 37.369 | 1248.23  |
| 27 | 08.05.12 | 21 46.153 | 170 37.369 | 8821.42  |
| 27 | 08.05.12 | 21 46.153 | 170 37.369 | 6114.52  |
| 28 | 07.06.12 | 18 33.897 | 176 30.406 | 48895.58 |
| 28 | 07.06.12 | 18 33.897 | 176 30.406 | 7857.04  |
| 28 | 07.06.12 | 18 33.897 | 176 30.406 | 3339.76  |
| 29 | 07.06.12 | 19 58.653 | 174 59.443 | 9647.43  |
| 29 | 07.06.12 | 19 58.653 | 174 59.443 | 7519.52  |
| 29 | 07.06.12 | 19 58.653 | 174 59.443 | 3789.07  |
| 30 | 08.06.12 | 21 16.990 | 173 34.862 | 946.73   |
| 30 | 08.06.12 | 21 16.990 | 173 34.862 | 801.95   |
| 30 | 08.06.12 | 21 16.990 | 173 34.862 | 1311.36  |
| 31 | 08.06.12 | 22 35.700 | 172 06.689 | 2575.43  |
| 31 | 08.06.12 | 22 35.700 | 172 06.689 | 2918.15  |
| 31 | 08.06.12 | 22 35.700 | 172 06.689 | 3507.91  |
| 32 | 09.06.12 | 23 44.992 | 170 32.263 | 0.00     |
| 32 | 09.06.12 | 23 44.992 | 170 32.263 | 0.00     |
| 32 | 09.06.12 | 23 44.992 | 170 32.263 | 0.00     |
| 33 | 09.06.12 | 25 04.307 | 168 42.713 | 2119.38  |
| 33 | 09.06.12 | 25 04.307 | 168 42.713 | 0.00     |
| 33 | 09.06.12 | 25 04.307 | 168 42.713 | 0.00     |
| 34 | 10.06.12 | 26 17.133 | 167 00.868 | 1423.41  |
| 34 | 10.06.12 | 26 17.133 | 167 00.868 | 764.70   |
| 34 | 10.06.12 | 26 17.133 | 167 00.868 | 729.39   |
| 35 | 10.06.12 | 27 31.614 | 165 11.757 | 711.58   |
| 35 | 10.06.12 | 27 31.614 | 165 11.757 | 2112.46  |
| 35 | 10.06.12 | 27 31.614 | 165 11.757 | 697.31   |
| 36 | 15.06.12 | 35 38.607 | 155 04.472 | 652.35   |
| 36 | 15.06.12 | 35 38.607 | 155 04.472 | 0.00     |
| 36 | 15.06.12 | 35 38.607 | 155 04.472 | 0.00     |
| 37 | 15.06.12 | 37 22.370 | 153 32.457 | 3594.90  |
| 37 | 15.06.12 | 37 22.370 | 153 32.457 | 9639.55  |
| 37 | 15.06.12 | 37 22.370 | 153 32.457 | 8349.88  |
| 38 | 16.06.12 | 42 16.869 | 148 58.254 | 5509.05  |
| 38 | 16.06.12 | 42 16.869 | 148 58.254 | 1845.78  |
| 38 | 16.06.12 | 42 16.869 | 148 58.254 | 0.00     |
| 39 | 17.06.12 | 42 49.848 | 148 26.515 | 1651.09  |
| 39 | 17.06.12 | 42 49.848 | 148 26.515 | 3050.52  |
| 39 | 17.06.12 | 42 49.848 | 148 26.515 | 2289.58  |
| 40 | 26.07.12 | 16 34.596 | 145 44.605 | 1960.78  |
| 40 | 26.07.12 | 16 34.596 | 145 44.605 | 5392.16  |
| 40 | 26.07.12 | 16 34.596 | 145 44.605 | 3921.57  |
| 41 | 27.07.12 | 15 01.649 | 145 23.440 | 2304.10  |
| 41 | 27.07.12 | 15 01.649 | 145 23.440 | 5172.33  |
| 41 | 27.07.12 | 15 01.649 | 145 23.440 | 13518.32 |
| 42 | 27.07.12 | 13 39.306 | 144 05.270 | 2398.91  |
| 42 | 27.07.12 | 13 39.306 | 144 05.270 | 956.41   |
| 42 | 27.07.12 | 13 39.306 | 144 05.270 | 1832.08  |
| 43 | 28.07.12 | 12 01.760 | 143 16.230 | 8954.09  |
| 43 | 28.07.12 | 12 01.760 | 143 16.230 | 3588.54  |
| 43 | 28.07.12 | 12 01.760 | 143 16.230 | 6582.30  |

|    |          |           |            |          |
|----|----------|-----------|------------|----------|
| 44 | 28.07.12 | 10 44.893 | 142 20.410 | 3937.23  |
| 44 | 28.07.12 | 10 44.893 | 142 20.410 | 446.59   |
| 44 | 28.07.12 | 10 44.893 | 142 20.410 | 1382.16  |
| 45 | 29.07.12 | 12 15.928 | 141 37.748 | 2796.53  |
| 45 | 29.07.12 | 12 15.928 | 141 37.748 | 1559.97  |
| 45 | 29.07.12 | 12 15.928 | 141 37.748 | 450.97   |
| 46 | 30.07.12 | 15 29.180 | 141 02.689 | 0.00     |
| 46 | 30.07.12 | 15 29.180 | 141 02.689 | 596.58   |
| 46 | 30.07.12 | 15 29.180 | 141 02.689 | 0.00     |
| 47 | 30.07.12 | 17 02.883 | 140 46.650 | 0.00     |
| 47 | 30.07.12 | 17 02.883 | 140 46.650 | 0.00     |
| 47 | 30.07.12 | 17 02.883 | 140 46.650 | 0.00     |
| 48 | 17.08.12 | 18 39.076 | 119 29.745 | 2747.58  |
| 48 | 17.08.12 | 18 39.076 | 119 29.745 | 1114.00  |
| 48 | 17.08.12 | 18 39.076 | 119 29.745 | 0.00     |
| 49 | 17.08.12 | 18 51.743 | 118 40.746 | 2488.88  |
| 49 | 17.08.12 | 18 51.743 | 118 40.746 | 1110.76  |
| 49 | 17.08.12 | 18 51.743 | 118 40.746 | 534.60   |
| 50 | 17.08.12 | 18 58.975 | 118 12.687 | 4394.68  |
| 50 | 17.08.12 | 18 58.975 | 118 12.687 | 1703.95  |
| 50 | 17.08.12 | 18 58.975 | 118 12.687 | 1143.61  |
| 51 | 17.08.12 | 19 06.486 | 117 43.548 | 0.00     |
| 51 | 17.08.12 | 19 06.486 | 117 43.548 | 612.37   |
| 51 | 17.08.12 | 19 06.486 | 117 43.548 | 1854.75  |
| 52 | 17.08.12 | 19 25.826 | 115 55.023 | 3401.75  |
| 52 | 17.08.12 | 19 25.826 | 115 55.023 | 599.94   |
| 52 | 17.08.12 | 19 25.826 | 115 55.023 | 4049.19  |
| 53 | 19.08.12 | 20 23.058 | 116 23.058 | 7748.76  |
| 53 | 19.08.12 | 20 23.058 | 116 23.058 | 7266.80  |
| 53 | 19.08.12 | 20 23.058 | 116 23.058 | 39225.93 |
| 54 | 19.08.12 | 20 18.934 | 115 40.132 | 3249.67  |
| 54 | 19.08.12 | 20 18.934 | 115 40.132 | 1245.08  |
| 54 | 19.08.12 | 20 18.934 | 115 40.132 | 654.36   |
| 55 | 22.08.12 | 19 47.716 | 115 58.478 | 1241.92  |
| 55 | 22.08.12 | 19 47.716 | 115 58.478 | 2129.73  |
| 55 | 22.08.12 | 19 47.716 | 115 58.478 | 496.75   |
| 56 | 22.08.12 | 20 22.838 | 115 08.123 | 0.00     |
| 56 | 22.08.12 | 20 22.838 | 115 08.123 | 0.00     |
| 56 | 22.08.12 | 20 22.838 | 115 08.123 | 1294.44  |
| 57 | 25.08.12 | 21 50.655 | 113 54.765 | 12846.12 |
| 57 | 25.08.12 | 21 50.655 | 113 54.765 | 1932.06  |
| 57 | 25.08.12 | 21 50.655 | 113 54.765 | 3462.42  |
