# Supplementary material for: Marine Plastic Pollution in Waters around Australia: Characteristics, Concentrations, and Pathways
Source: PubMed Central journal article supplement (PMC3842337; doi:10.1371/journal.pone.0080466), 2013-11-27

# Maps S1

June 2011

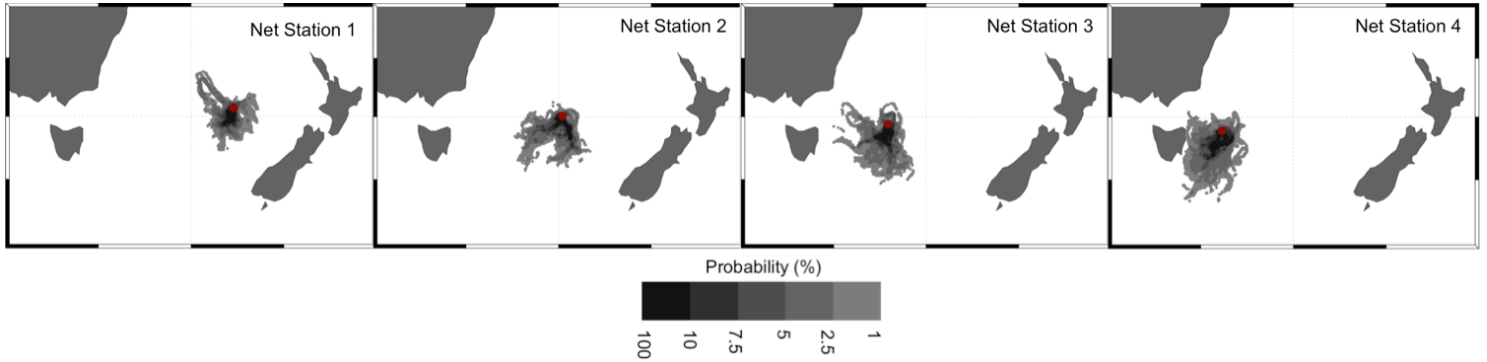

August 2011

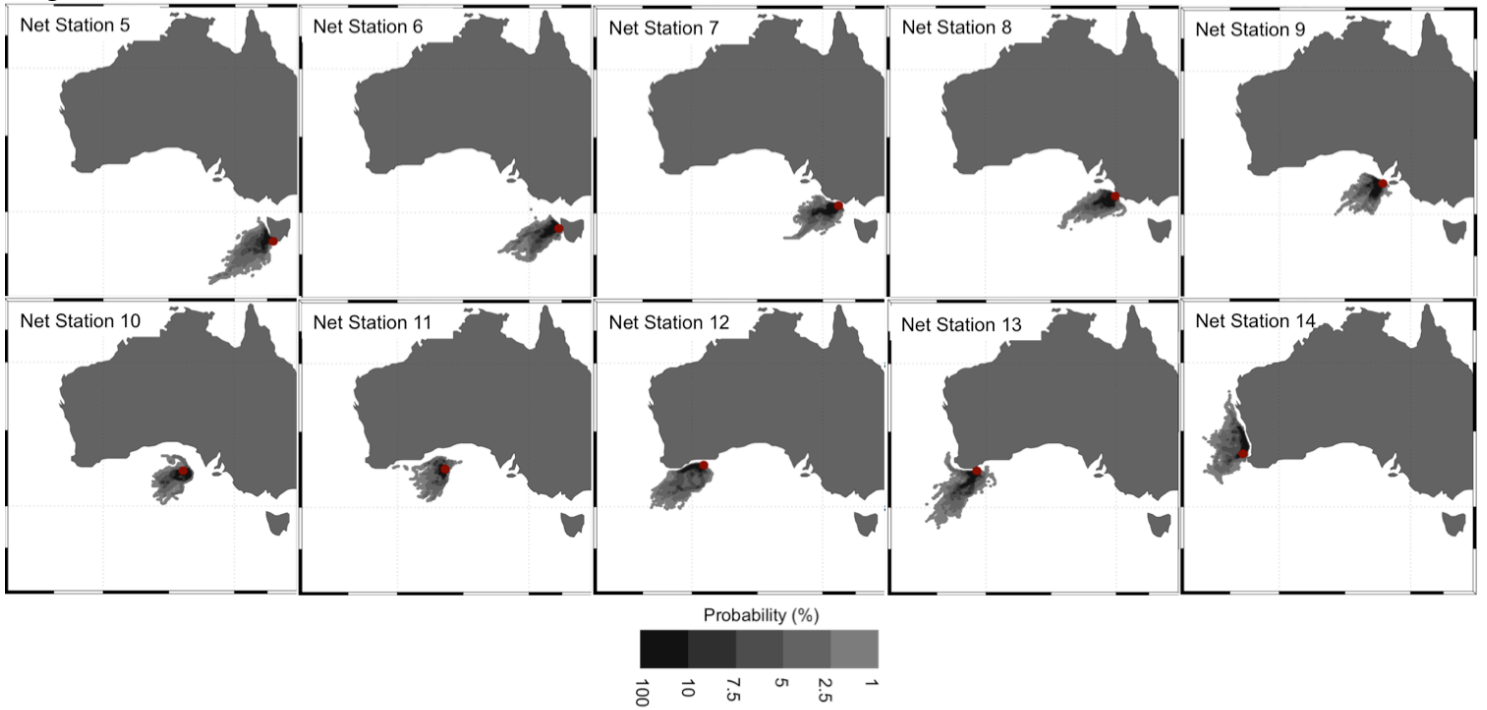

April 2012

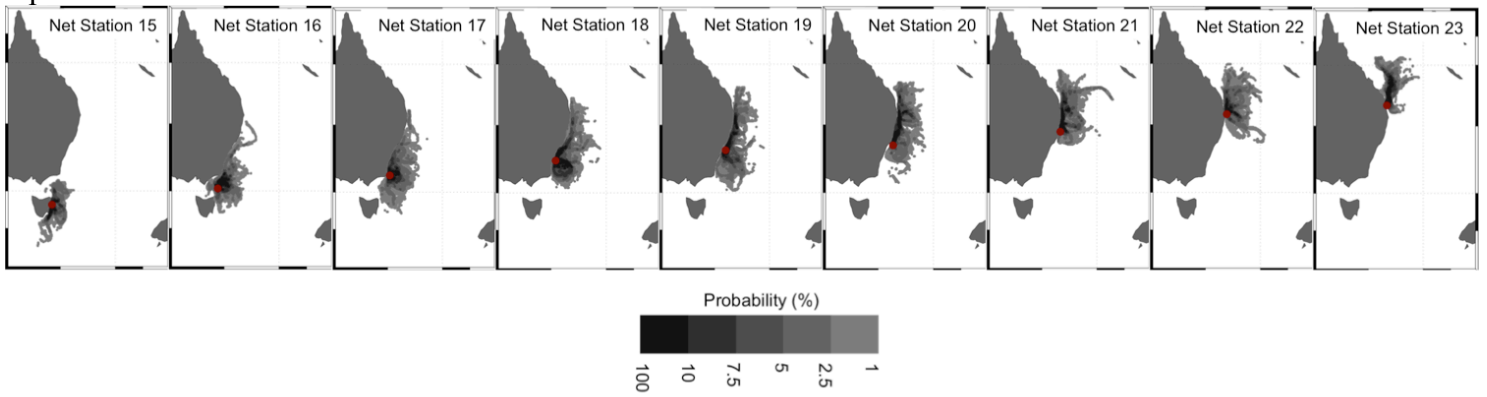

May 2012

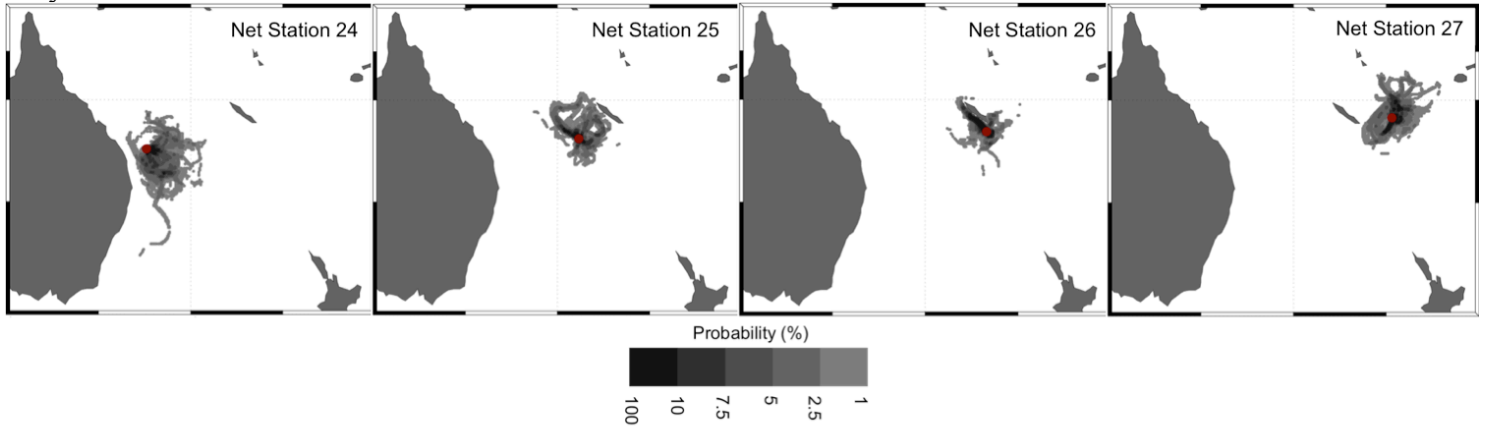

June 2012

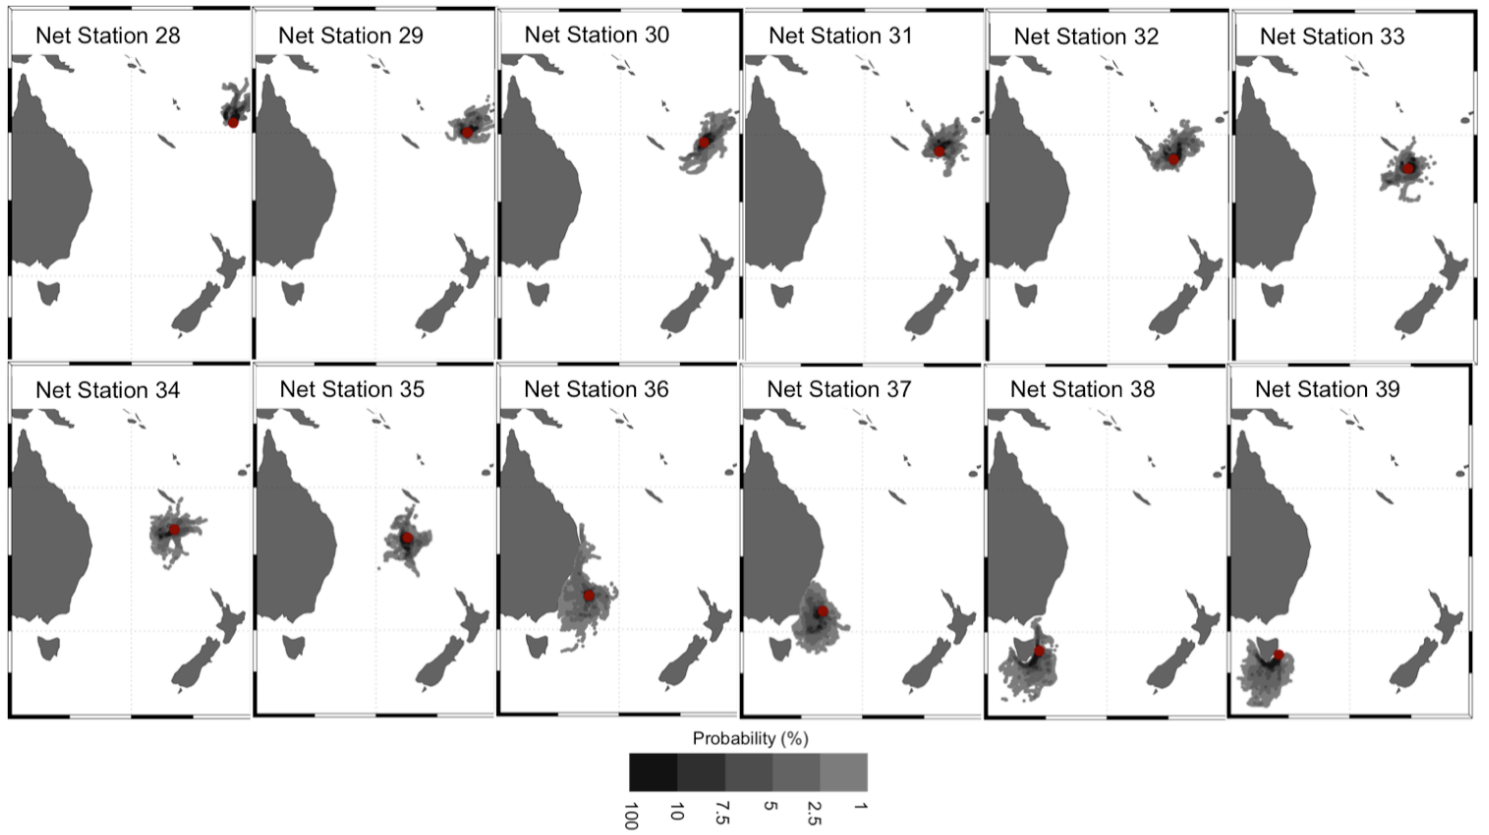

July 2012

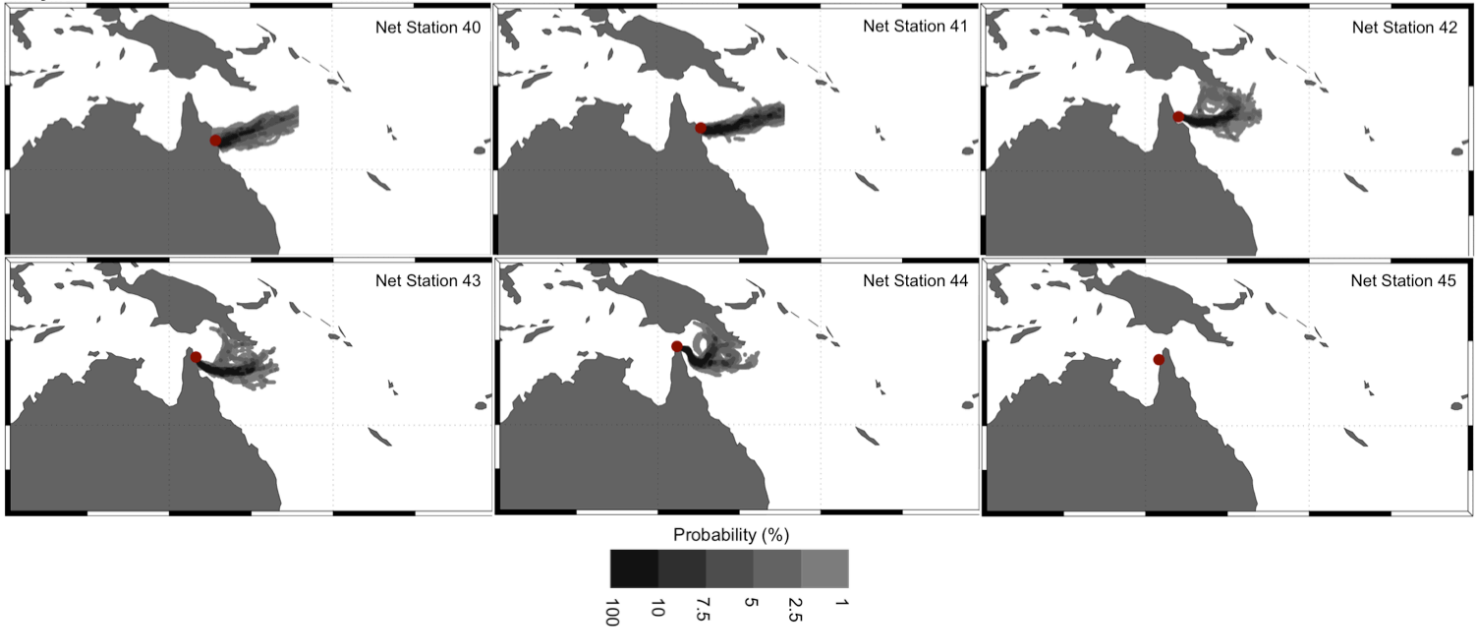

August 2012

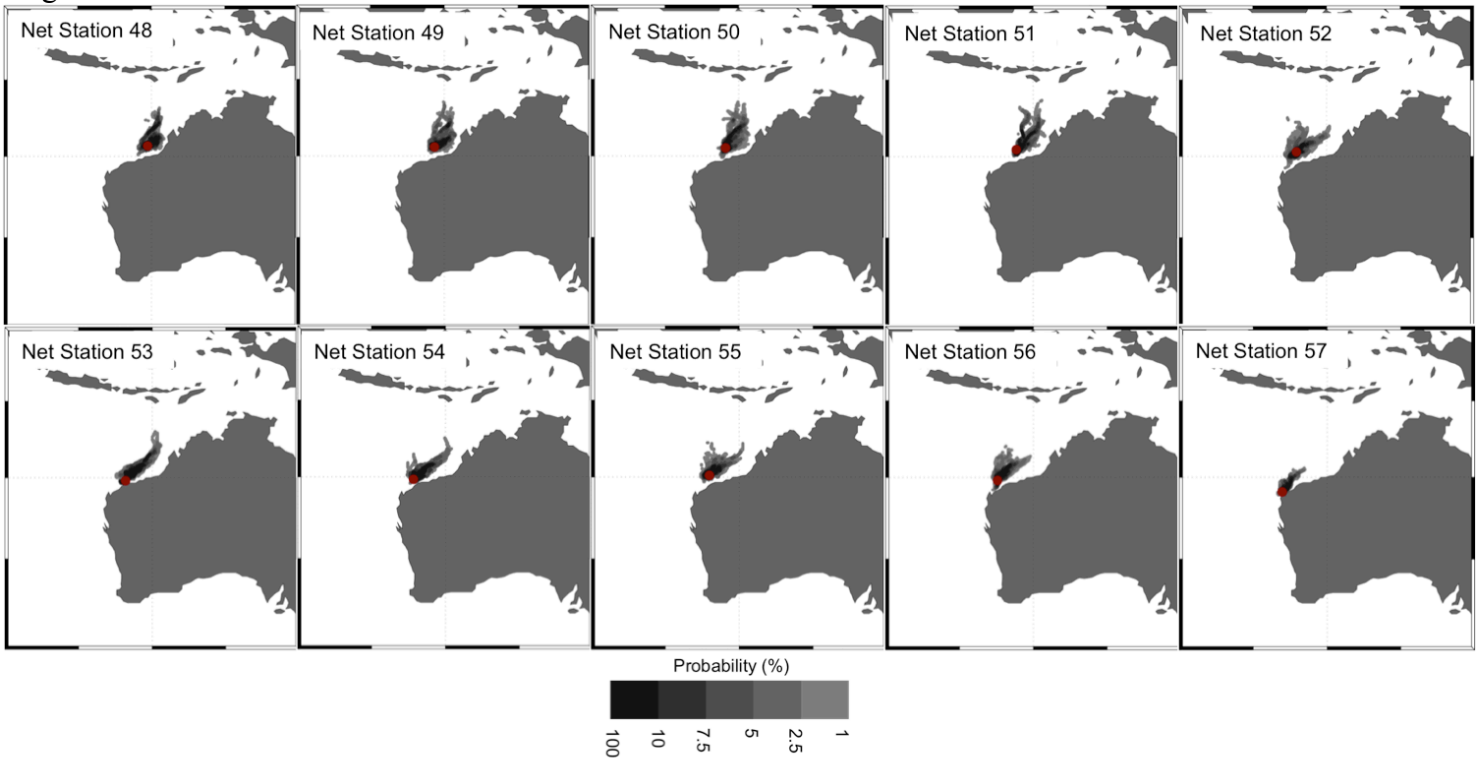

Supplement: pone.0080466.s002.pdf [file pone.0080466.s002.pdf]
