# Supplementary material for: Marine Plastic Pollution in Waters around Australia: Characteristics, Concentrations, and Pathways
Source: PubMed Central journal article supplement (PMC3842337; doi:10.1371/journal.pone.0080466), 2013-11-27

## Maps S2

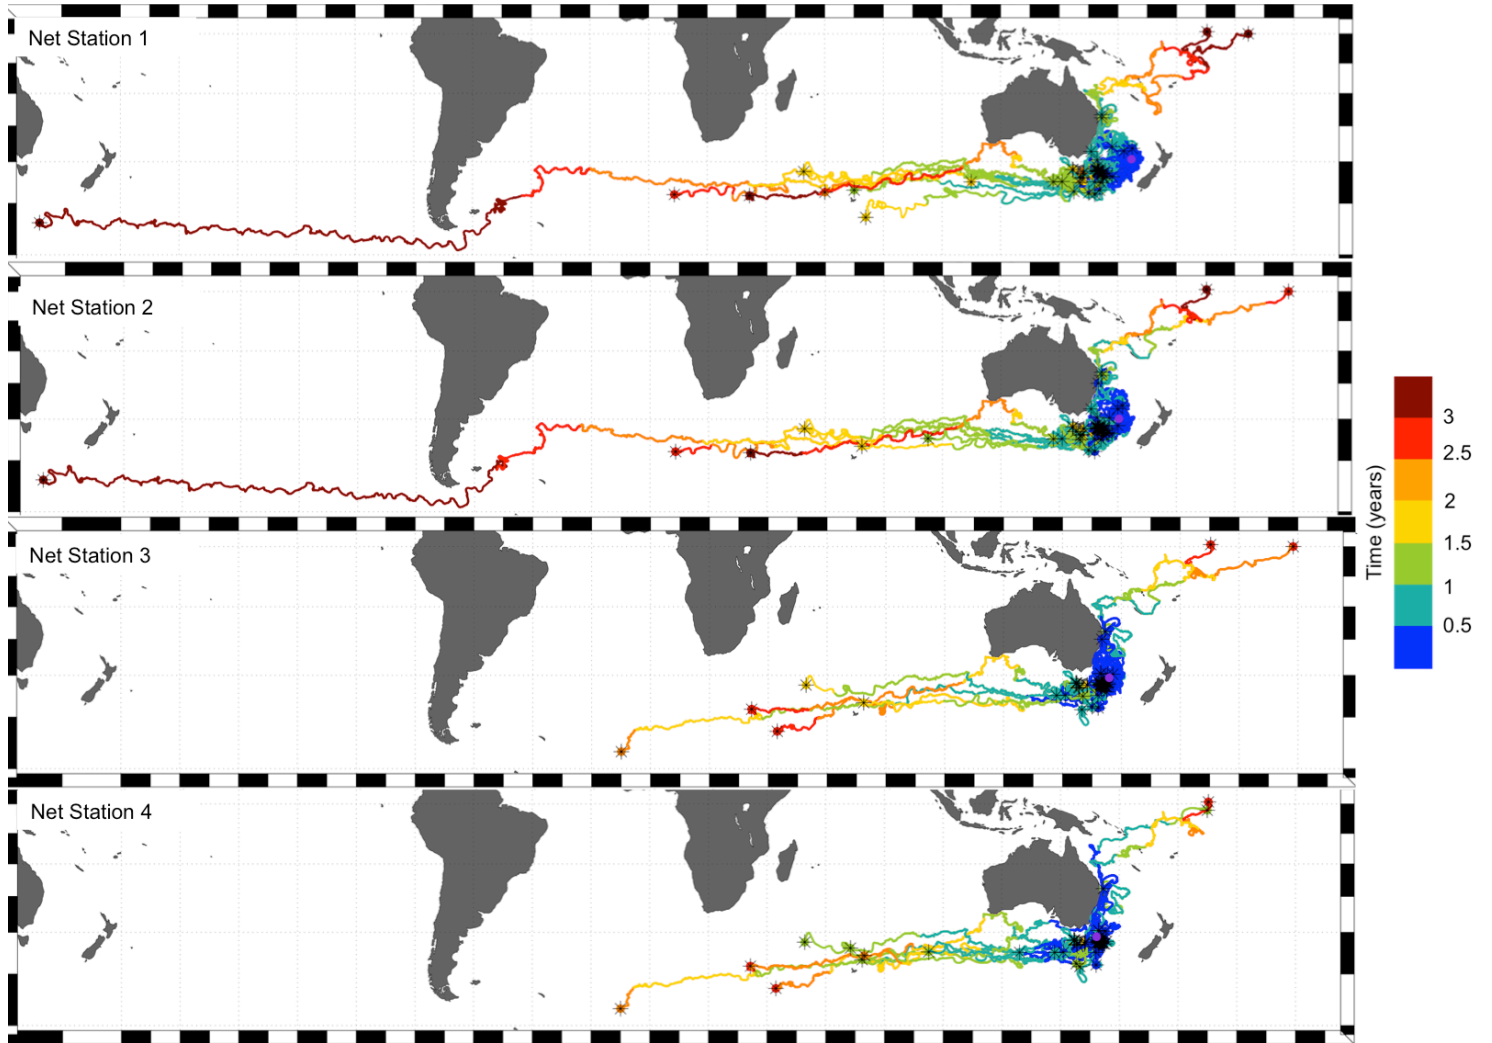

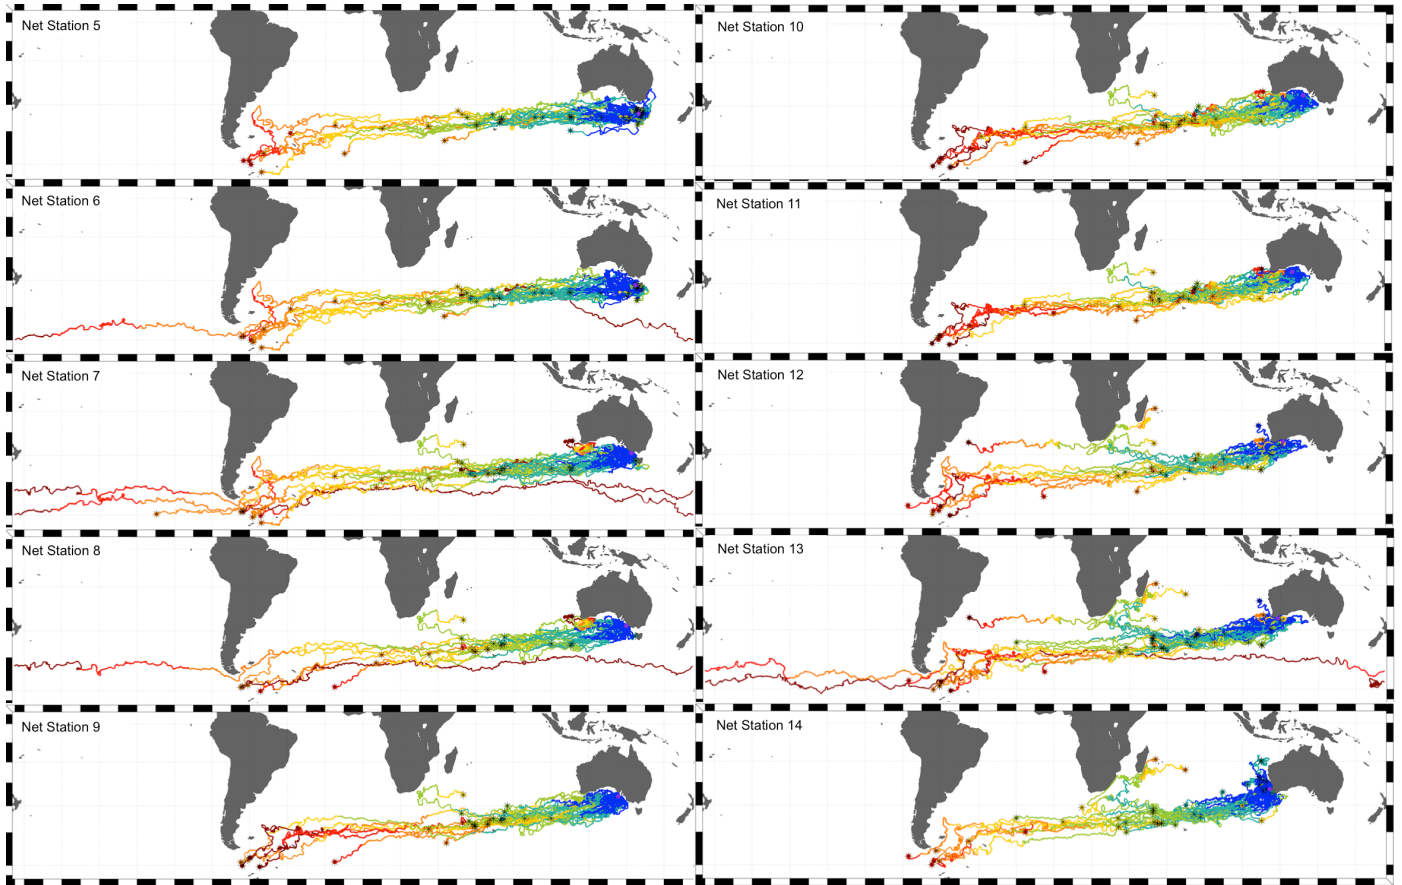

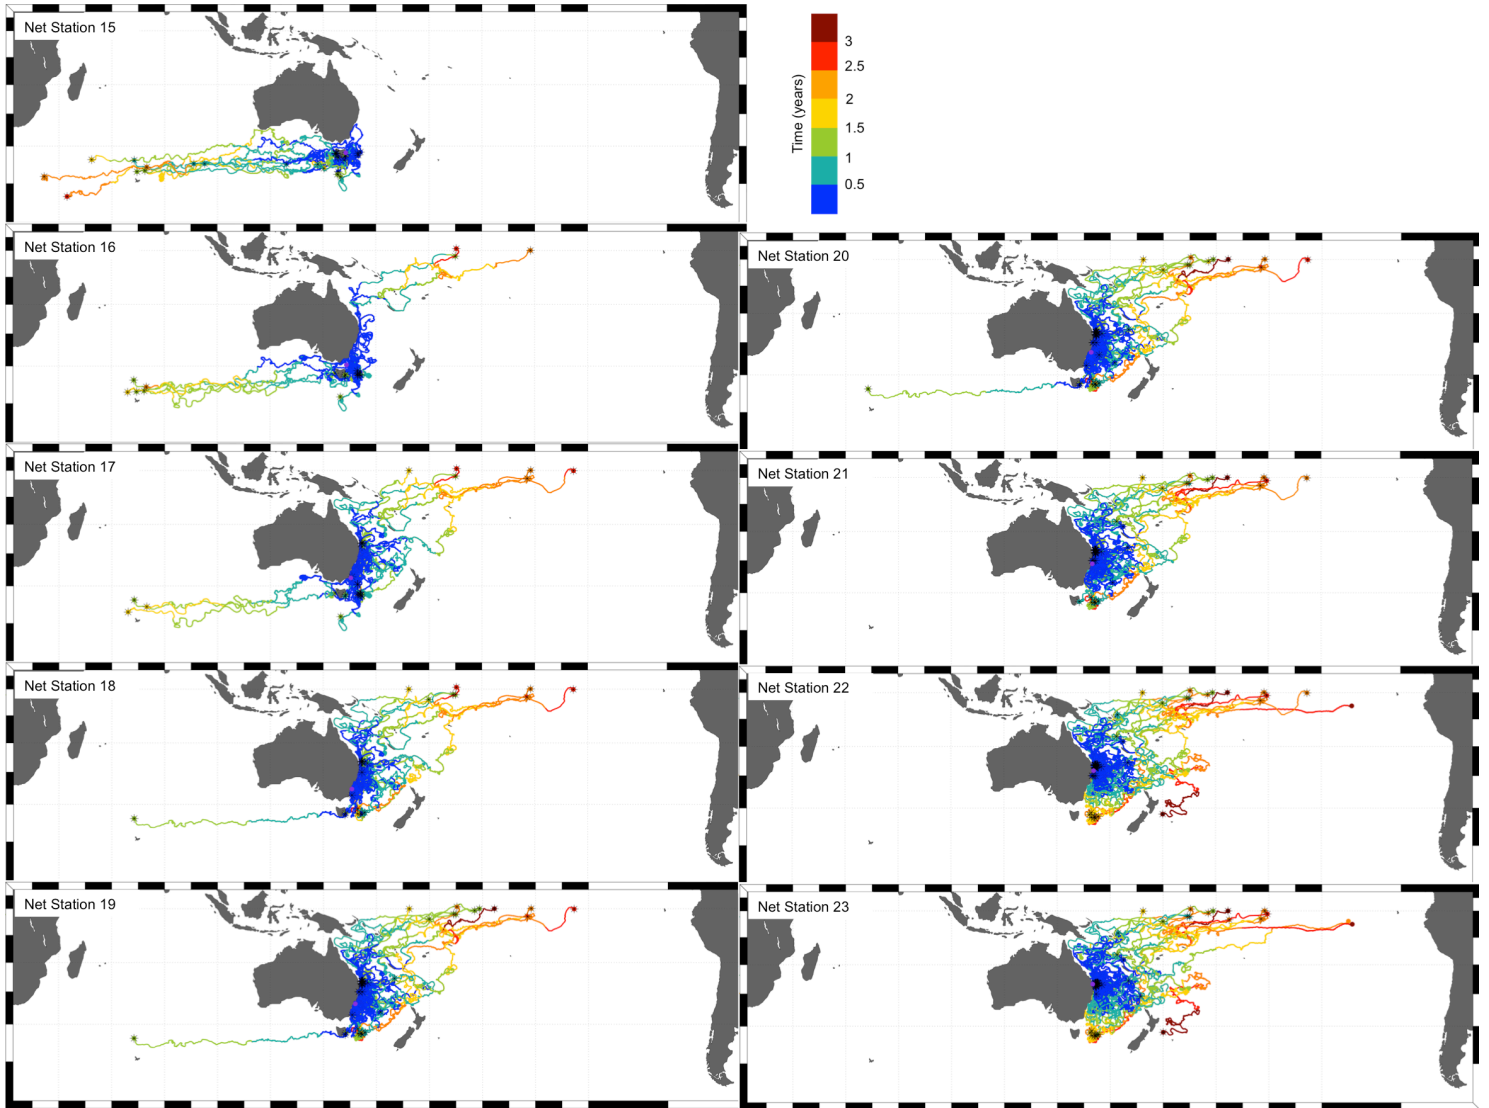

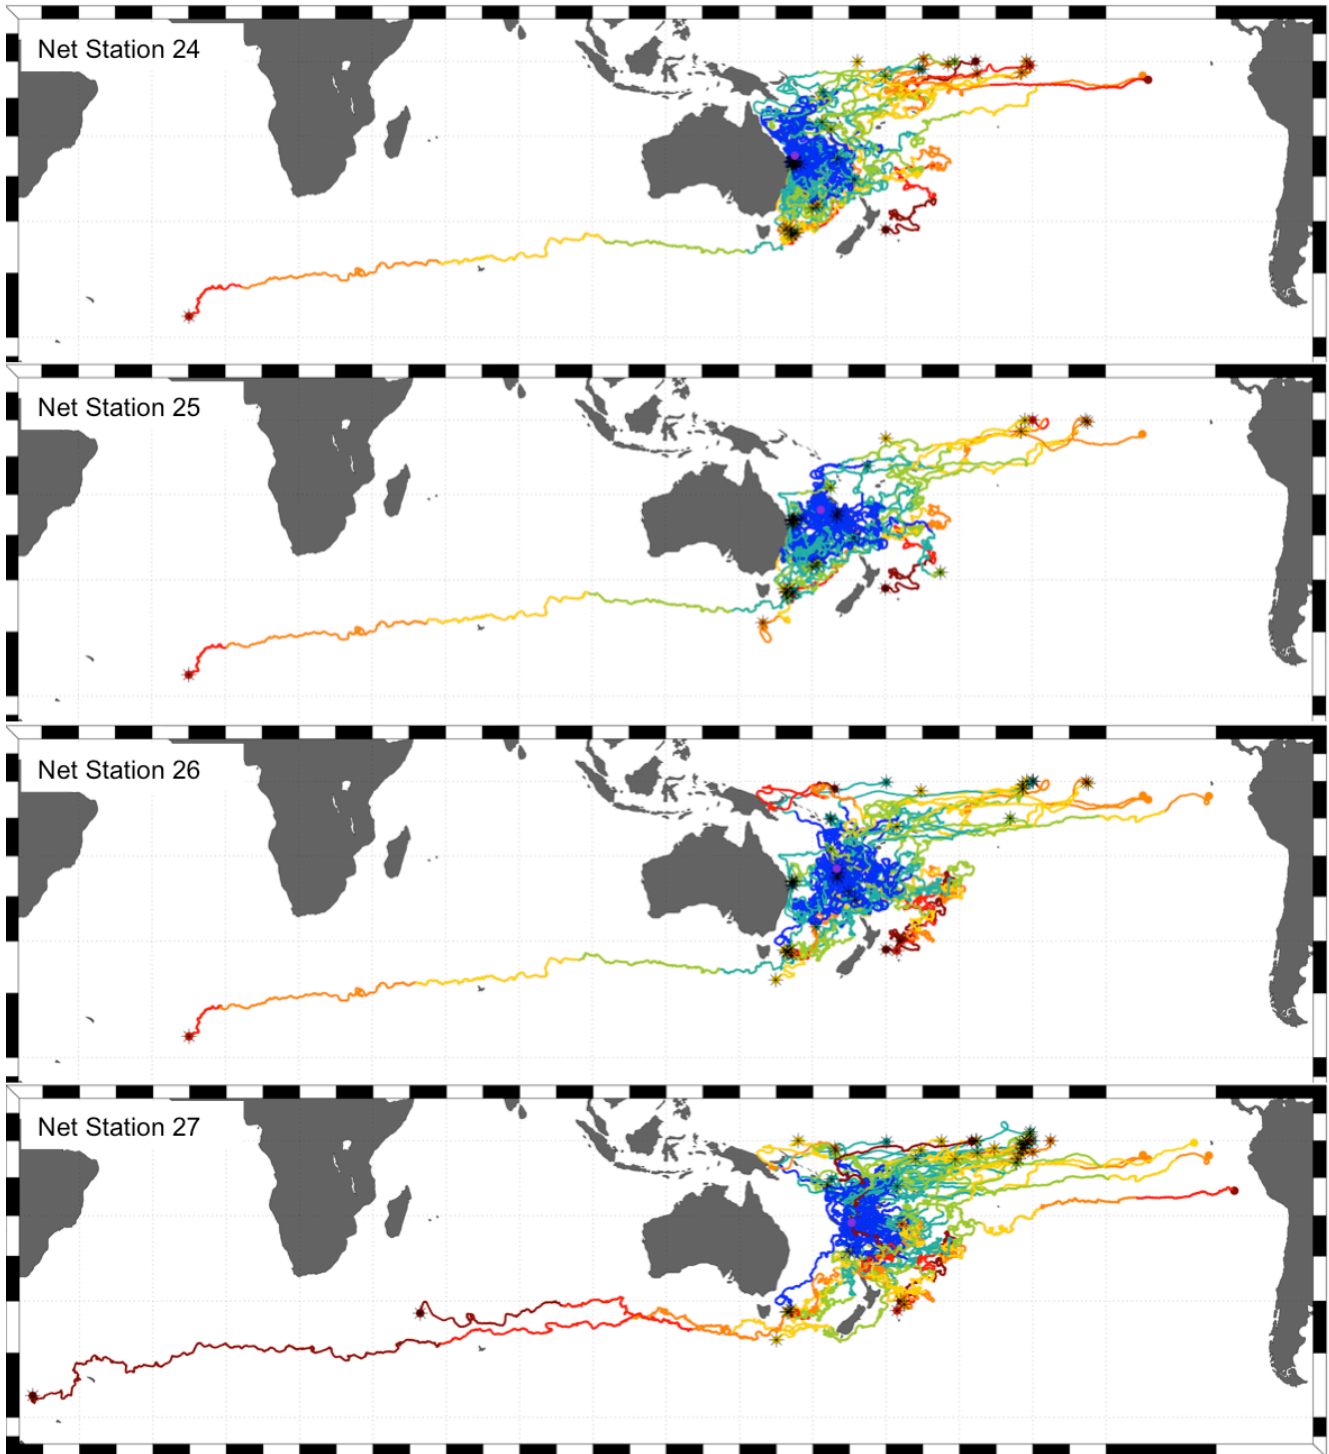

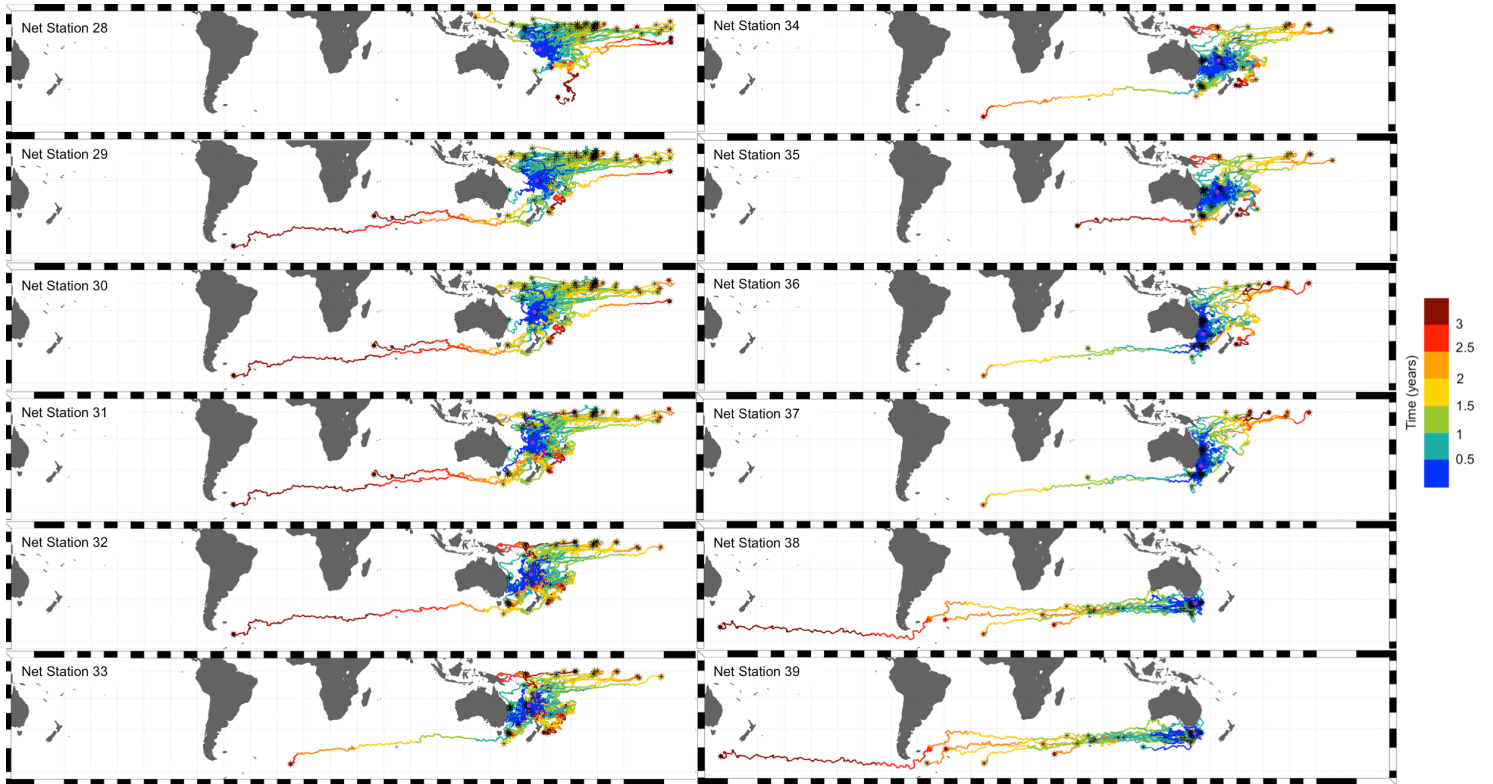

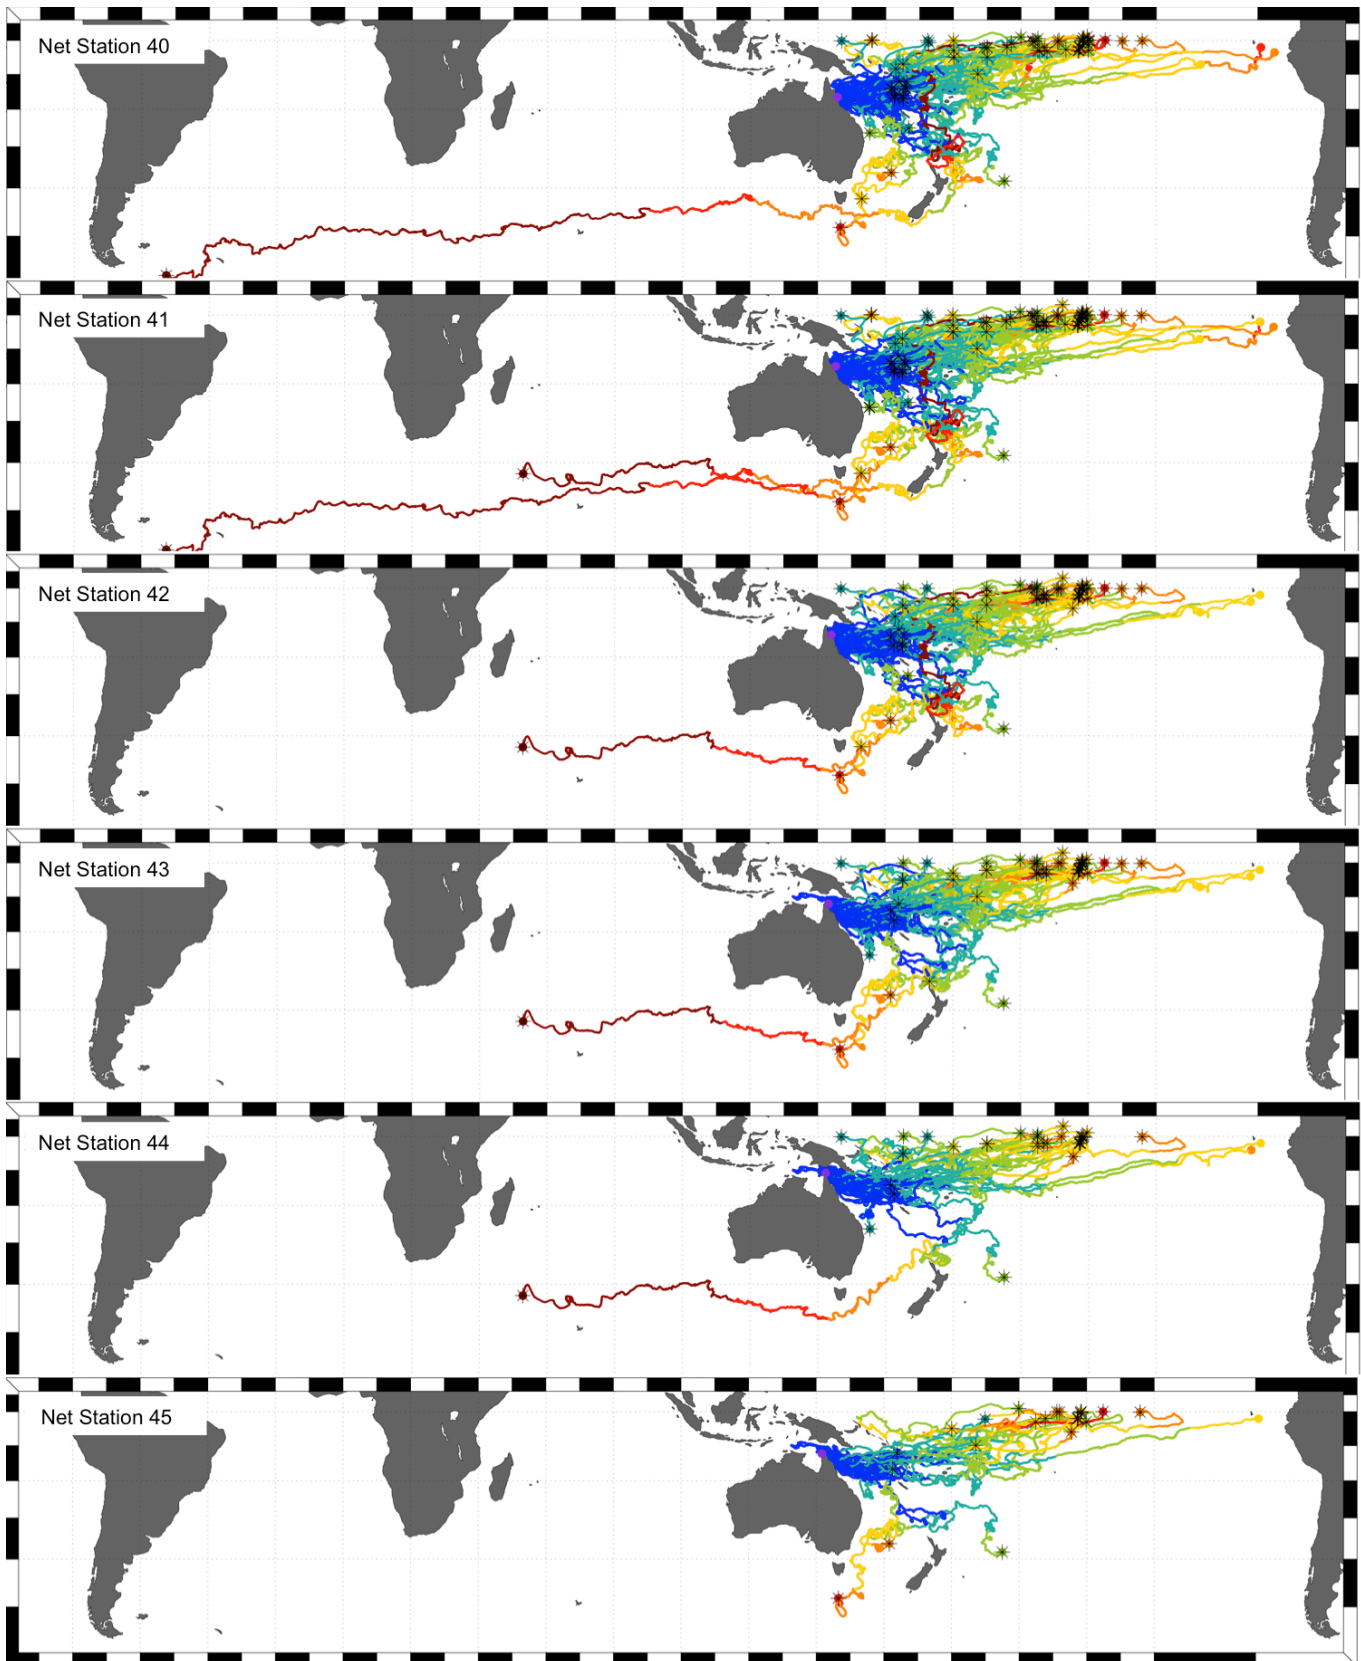

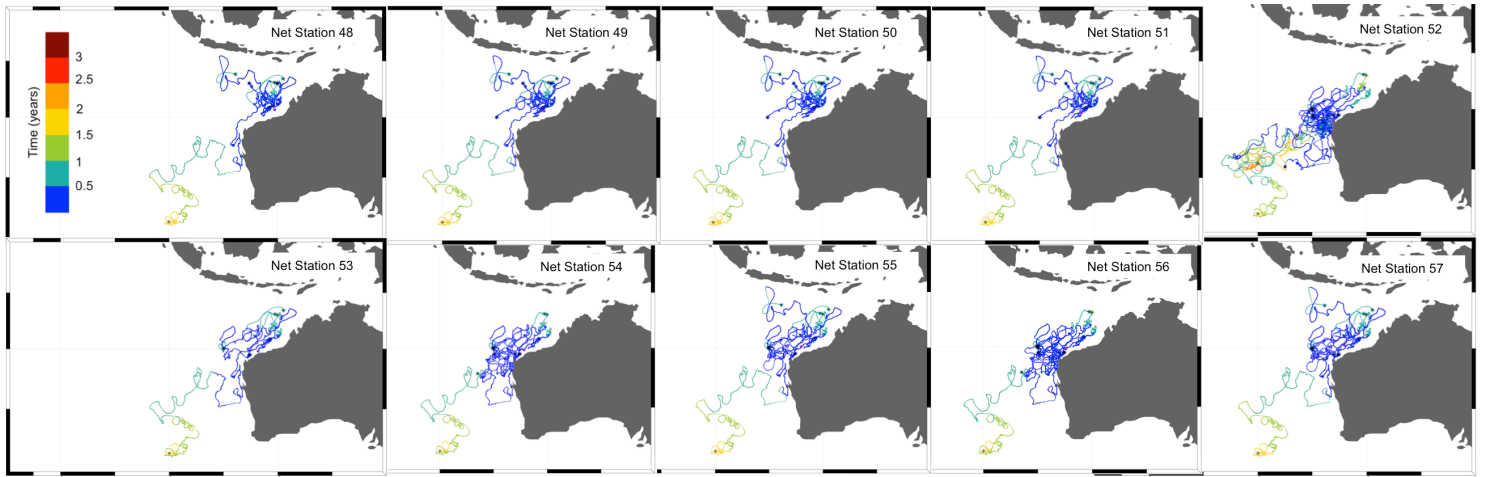

Supplement: pone.0080466.s003.pdf [file pone.0080466.s003.pdf]
